# Supplementary material for: Optimization, Metabolomic Analysis, Antioxidant Potential and Depigmenting Activity of Polyphenolic Compounds from Unmature Ajwa Date Seeds (Phoenix dactylifera L.) Using Ultrasonic-Assisted Extraction
Source: MDPI journal article supplement (doi:10.3390/antiox13020238), 2024-02-15
Supplement: s1 [file s1]

## Supplementary Data

Ultrasonic-assisted extraction of polyphenolic compounds from unripe Ajwa date seeds (*Phoenix dactylifera* L.): Optimization, metabolomic analysis and depigmentation activity

Fanar Alshammari<sup>1</sup>, Md Badrul Alam<sup>1,2</sup>, Marufa Naznin<sup>3</sup>, Sunghwan Kim<sup>3,4</sup>, Sang-Han Lee<sup>1,2\*</sup>

<sup>1</sup>Department of Food Science and Biotechnology, Graduate School, Kyungpook National University, Daegu 41566, Korea

<sup>2</sup>Food and Bio-Industry Research Institute, Inner Beauty/Antiaging Center, Kyungpook National University, Daegu 41566, Korea

<sup>3</sup>Department of Chemistry, Kyungpook National University, Daegu, 41566, Republic of Korea

<sup>4</sup>Mass Spectrometry Converging Research Center and Green-Nano Materials Research Center, Daegu, 41566, Republic of Korea

\*Corresponding author:

\*Correspondence to: Dr. Sang-Han Lee; Department of Food Science and Biotechnology, Kyungpook National University, Daegu 41566, Korea, Phone: (82)053-950-7754 (Office); (82)010-2537-7659 (Mobile); Fax: 053-950-6772; Email: sang@knu.ac.kr

## 1. Experimental

### 1.1 Anti-tyrosinase activity

The assessment of the anti-tyrosinase inhibitory potential of UMS extracts followed established protocols, as detailed in prior work (Alam et al., 2023). As a benchmark, arbutin (ARB) was employed as a positive control. The percentage inhibition of tyrosinase activity was computed using Eq. 1.

$$(\% \text{ inhibition}) = \left[ \left( 1 - \frac{Abs_{sample}}{Abs_{control}} \right) \right] \times 100 \text{ -----(1)}$$

where  $Abs_{control}$ , and  $Abs_{sample}$  represent the absorbance of the control and the sample, respectively. Each sample was subjected to this analysis thrice to ensure robust and reliable results.

### 1.2 Cell culture and cell viability assay

Highly pigmented human melanoma cells (MNT-1), purchased from ATCC (Rock-ville, MD, USA), were kept alive at 37 °C under 5% CO<sub>2</sub> in Dulbecco's Modified Eagle Me-dium (DMEM) supplemented with 10% fetal bovine serum (FBS, Hyclone, Utah, UT, USA), streptomycin–penicillin (100 µg/mL each), 10% AIM-V medium, 0.1mM non-essential amino acid mix and 1mM sodium pyruvate (Invitrogen, Waltham, MA, USA). To confirm the cytotoxicity of UMS the 3-(4,5-dimethyl-2-thiazolyl)-2,5-diphenyl-2H-tetrazolium bromide (MTT) assay was used as described in our previous report [1].

## Reference

1. Alam, M.B.; Park, N.H.; Song, B.R.; Lee, S.H. Antioxidant Potential-Rich Betel Leaves (*Piper betle* L.) Exert Depigmenting Action by Triggering Autophagy and Downregulating MITF/Tyrosinase In Vitro and In Vivo. *Antioxidants* **2023**, *12*, 374.

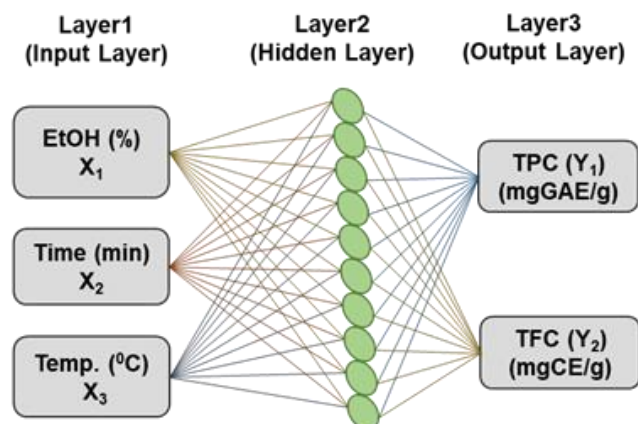

Figure S1. The ANN models architecture.

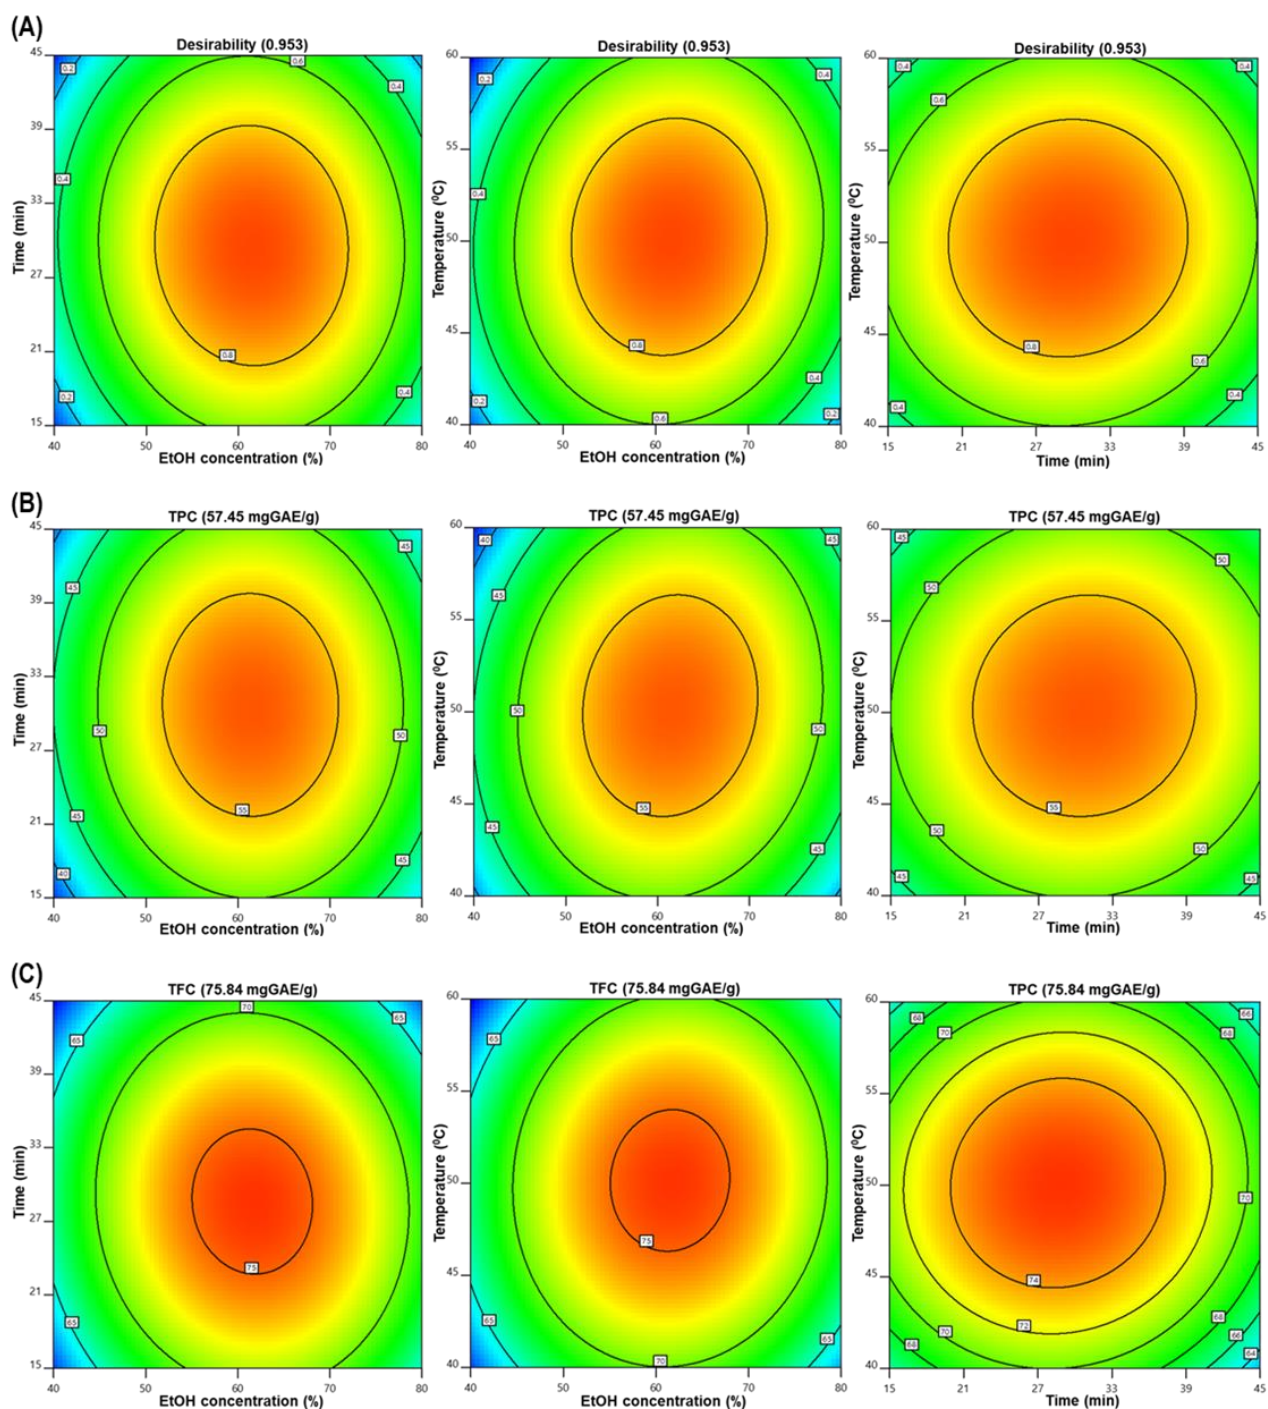

Figure S2. The contour plot as a function of ethanol concentration, extraction time and temperature at optimum condition.

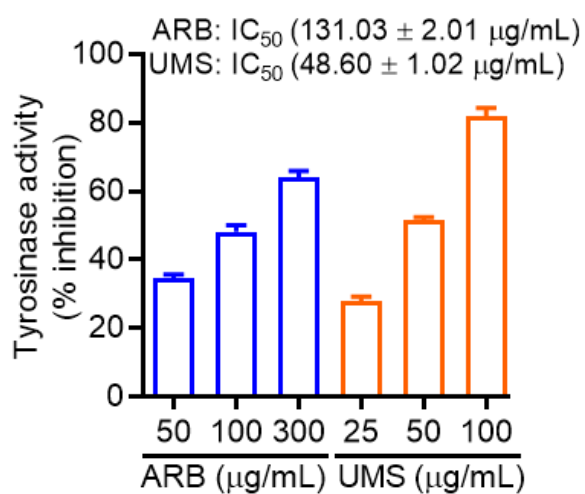

Figure S3. Mushroom tyrosinase inhibition activity of UMS optimized extract. ARB: arbutin.

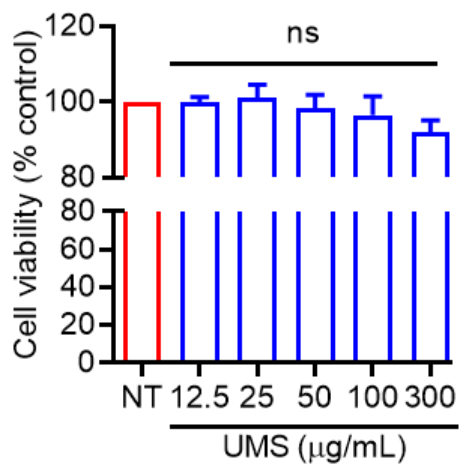

Figure S4. Effect of optimized UMS extract on MNT-1 cell viability.

**Table S1. List of antibodies used in this study.**

| <b>Antibody</b>      | <b>Dilution</b> | <b>Supplier</b>           | <b>Catalog No.</b> | <b>Host</b> | <b>MW,<br/>kDa</b> |
|----------------------|-----------------|---------------------------|--------------------|-------------|--------------------|
| Anti-TYR             | 1:1000          | Abcam, Cambridge, UK      | ab170905           | Rabbit      | 60                 |
| Anti-TRP-1           | 1:1000          | Abcam, Cambridge, UK      | ab235447           | Rabbit      | 61                 |
| Anti-TRP-2           | 1:1000          | Abcam, Cambridge, UK      | ab221144           | Rabbit      | 59                 |
| Anti-MITF            | 1:1000          | Abcam, Cambridge, UK      | ab140606           | Rabbit      | 58                 |
| Anti-p-p38           | 1:500           | Bioworld Technology, Inc. | BS4635             | Rabbit      | 42                 |
| Anti-p38             | 1:500           | Bioworld Technology, Inc. | BS3567             | Rabbit      | 42                 |
| Anti-p-ERK1/2        | 1:500           | Bioworld Technology, Inc  | BS5016             | Rabbit      | 42,44              |
| Anti-ERK1/2          | 1:500           | Bioworld Technology, Inc. | BS 6472            | Rabbit      | 42,44              |
| Anti-JNK             | 1:500           | Bioworld Technology, Inc. | BS3630             | Rabbit      | 46,54              |
| Anti-p-JNK           | 1:500           | Bioworld Technology, Inc. | BS4322             | Rabbit      | 46,54              |
| Anti- $\beta$ -actin | 1:1000          | Abcam, Cambridge, UK      | ab8227             | Rabbit      | 45                 |

Table S2. Independent process variables with experimental ranges and levels for ultrasound-assisted extraction of UMS.

| Input variables       | unit               | Code  | -1 | 0  | +1 |
|-----------------------|--------------------|-------|----|----|----|
| Ethanol concentration | %                  | $X_1$ | 40 | 60 | 80 |
| Time                  | min                | $X_2$ | 15 | 30 | 45 |
| Temperature           | $^{\circ}\text{C}$ | $X_3$ | 40 | 50 | 60 |
